# Supplementary material for: Metabolic Syndrome, Neurotoxic 1-Deoxysphingolipids and Nervous Tissue Inflammation in Chronic Idiopathic Axonal Polyneuropathy (CIAP)
Source: PLoS One. 2017 Jan 23;12(1):e0170583. doi: 10.1371/journal.pone.0170583 (PMC5256922; doi:10.1371/journal.pone.0170583)
Supplement: S3 Table — (XLSX) [file pone.0170583.s003.xlsx]

## Sheet: Tabelle1
Participants	sural SNAP left (μV)	sural SNAP right (μV)	sural NCV left (m/s)	sural NCV right (m/s)
DSPN
DM1	0	3	0	47
DM2	biopsy	2.6	biopsy	36
DM3	6.3	10.3	47	56
DM4	6.6	11.3	67	48
DM5	0	0	0	0
DM6	0	not obtainable	0	not obtainable
DM7	15.7	0	56	0
DM8	1.9	2.8	37	41
DM9	4	biopsy	50	biopsy
DM10	3	biopsy	39	biopsy
DM11	2.8	2.7	46	42
DM12	edema	edema	edema	edema
DM13	biopsy	2.6	biopsy	36.5
DM14	0	7.8	0	50
DM15	8	biopsy	48	biopsy
DM16	biopsy	7.6	47	not obtainable
DM17	0	0	0	0
DM18	biopsy	5.5	0	53
DM19	14.8	4.9	39	42
DM20	2.3	1.8	44	39
DM21	0	5.3	0	43
DM22	3	4.1	37	38
DM23	4.2	2.4	36	50
DM24	1.1	3.8	44	47
DM25	2.5	biopsy	44	biopsy
DM26	15	4.7	48	44
DM27	8.5	10.8	44	47
DM28	2.6	1.5	48	44
CIAP
IP1	biopsy	4.2	biopsy	42
IP2	7.4	4.5	38	38
IP3	biopsy	4.3	biopsy	44
IP4	biopsy	3.8	biopsy	50
IP5	edema	edema	edema	edema
IP6	4.4	5.3	47	52
IP7	0	3.1	0	49
IP8	6.1	biopsy	51	biopsy
IP9	7.2	0	45	0
IP10	0	0	0	0
IP11	0	0	0	0
IP12	3.9	3.9	49	47
IP13	0	0	0	0
IP14	1.3	2.9	42	47
IP15	11.1	10.8	50	43
IP16	4.9	3.6	39	39
IP17	12.3	biopsy	48	biopsy
IP18	6.6	biopsy	50	biopsy
IP19	biopsy	4.5	biopsy	36
IP20	0.2	2	42	46
IP21	6.1	13.1	52	52
IP22	0	0	0	0
IP23	0	0	0	0
IP24	0.2	7.4	54	48
IP25	2.9	2.7	46	38
IP26	6.4	6.7	35	34
IP27	6.7	8.4	52	48
IP28	2.4	0	42	0
IP29	2.8	7.4	35	not obtainable
IP30	biopsy	3.2	biopsy	54
